# Supplementary material for: A Cryptic Cytoplasmic Male Sterility Unveils a Possible Gynodioecious Past for Arabidopsis thaliana
Source: PLoS One. 2013 Apr 29;8(4):e62450. doi: 10.1371/journal.pone.0062450 (PMC3639211; doi:10.1371/journal.pone.0062450)
Supplement: Table S5 — Distribution of orf117Sha among worldwide accessions. (XLS) [file pone.0062450.s013.xls]

## Sheet: Feuil1
Original Accession name	Versailles identification number	Chlorotype*	sterility-inducing cytoplasm**	orf117Sha	group in nuclear clustering analysis*** K=4
Col-0	186AV	A	nd	absent	4
Est-0	71AV	A	nd	absent	4
Mh-0	175AV	AA	nd	absent	4
Mh-1	215AV	AA	nd	absent	4
Pa-1	50AV	AC	nd	absent	4
Mir-0	216AV	AD	nd	absent	3
Had-6b	545AV	AD-like	nd	absent	2
Van-0	161AV	AD-like	nd	absent	3
Can-0	163AV	AE	nd	absent	4
Cvi-0	166AV	AF	nd	absent	2
Co-4	174AV	AG	nd	absent	4
C24	183AV	AH	nd	absent	3
Co-1	173AV	AH-like	nd	absent	3
Alc-0	178AV	AI	nd	absent	2
Petergof	226AV	AI	nd	absent	2
Sah-0	233AV	AI	nd	absent	2
Cant-1	599AV	AI-like	nd	absent	2
Tsu-0	91AV	AJ	nd	absent	4
Bur-0	172AV	AK	nd	absent	2
Oy-0	224AV	AK	nd	absent	4
Ran	21AV	AK	nd	absent	3
St-0	62AV	AK	nd	absent	4
Are-10	641AV	AK-like	nd	absent	2
Are-11	642AV	AK-like	nd	absent	2
Bas-3	349AV	AK-like	nd	absent	1
Ei-2	102AV	AK-like	nd	absent	4
Kl-0	106AV	AK-like	nd	absent	4
Ob-1	496AV	AK-like	nd	absent	4
Jm-0	206AV	AL	nd	absent	4
Cos-1	324AV	A-like	nd	absent	3
Sk-2	559AV	AL-like	nd	absent	2
Sog-1	564AV	AL-like	nd	absent	2
Pyl-1	8AV	AM	nd	absent	2
Mr-0	148AV	AN	nd	absent	2
Akita	252AV	B	nd	absent	4
Bay-0	41AV	B	nd	absent	4
Lip-0	63AV	B	nd	absent	4
Lu-1	54AV	B	nd	absent	4
N11	285AV	B	nd	absent	1
Per-1	100AV	B	nd	absent	1
Sap-0	234AV	B	nd	absent	4
Sav-0	235AV	B	nd	absent	4
Sp-0	53AV	B	nd	absent	4
Ta-0	56AV	B	nd	absent	4
Yo-0	250AV	B	nd	absent	3
Etna-2	703AV	B-E-F-G-like	nd	absent	2
Al-0	456AV	B-like	nd	absent	2
Bn-0	278AV	B-like	nd	absent	3
Ciste-1	655AV	B-like	nd	absent	3
Gie-0	135AV	B-like	nd	absent	4
Las-0	701AV	B-like	nd	absent	3
Lod-2	562AV	B-like	nd	absent	2
Moran-1	660AV	B-like	nd	absent	3
Na-1	164AV	B-like	nd	absent	4
Ka-0	55AV	D	nd	absent	4
N15	268AV	D	nd	absent	1
N3	291AV	D-like	nd	absent	1
N9	284AV	D-like	nd	absent	1
Ldv-5	11AV	E	nd	absent	3
Bl-1	42AV	F	nd	absent	4
Bla-1	76AV	F	nd	absent	3
Gre-0	200AV	F	nd	absent	3
Ita-0	157AV	F	nd	absent	2
Jl-3	205AV	F	nd	absent	4
Mt-0	94AV	F	nd	absent	4
Ost-0	61AV	F	nd	absent	2
Sorbo	238AV	F	No	absent	1
Ts-1	515AV	F	nd	absent	3
Cala-1	593AV	F-like	nd	absent	4
Gu-0	118AV	F-like	nd	absent	4
H55	201AV	F-like	nd	absent	2
Lov-1	370AV	F-like	nd	absent	2
Mc-0	170AV	F-like	nd	absent	2
Mol-7	2AV	F-like	nd	absent	3
Ove-0	146AV	F-like	nd	absent	4
Pla-0	501AV	F-like	nd	absent	3
Sij-1	356AV	F-like	nd	absent	1
Sij-2	357AV	F-like	nd	absent	1
Sij-3	358AV	F-like	nd	absent	1
Ko-2	46AV	G	nd	absent	4
Ler-1	213AV	G	nd	absent	4
Bd-0	52AV	G-like	nd	absent	4
Wal-HäsB-4	690AV	G-like	nd	absent	4
Hiroshima	254AV	H	nd	absent	2
Ishikawa	253AV	H	nd	absent	2
Sakata	257AV	H	nd	absent	2
Tokushima	258AV	H	nd	absent	2
Yamagata	259AV	H	nd	absent	2
Kas-2	555AV	H-like	nd	absent	1
X9481B	261AV	I	yes	present	1
Dja-1	534AV	I	yes	present	1
Dja-5	535AV	I	yes	present	1
Kar-1	531AV	I	yes	present	1
Kar-2	532AV	I	yes	present	1
Kyr-1	538AV	I	yes	present	1
Kz-9	403AV	I	No	absent	1
Neo-3	539AV	I	yes	present	1
Shahdara	236AV	I	yes	present	1
Sus-1	533AV	I	yes	present	1
Zal-1	536AV	I	yes	present	1
Zal-3	537AV	I	yes	present	1
Nov-01	340AV	I-like	nd	present	1
Nov-02	341AV	I-like	nd	present	1
Altai-2	547AV	I-like	nd	present	1
Bas-2	348AV	I-like	nd	absent	1
Bij	355AV	I-like	nd	present	1
Kidr-1	651AV	I-like	nd	absent	1
Kly-1	327AV	I-like	nd	present	1
Kly-2	328AV	I-like	nd	present	1
Kly-3	329AV	I-like	nd	present	1
Kly-4	330AV	I-like	nd	present	1
Kly-5	331AV	I-like	nd	present	1
Kly-6	332AV	I-like	nd	present	1
K-oz-1	333AV	I-like	nd	present	1
K-oz-2	334AV	I-like	nd	present	1
K-oz-3	335AV	I-like	nd	present	1
Leb-1	336AV	I-like	nd	present	1
Leb-2	337AV	I-like	nd	absent	1
Leb-3	338AV	I-like	nd	absent	1
N16	287AV	I-like	nd	absent	1
Rak-2	345AV	I-like	nd	present	1
Shigu-2	650AV	I-like	nd	present	1
Sij-4	359AV	I-like	nd	absent	1
Stepn-1	648AV	I-like	nd	present	1
Westkar-1	708AV	I-like	nd	present	1
Westkar-3	709AV	I-like	nd	present	1
Db-1	132AV	J	No	absent	4
Kz-1	402AV	J	No	absent	1
N13	266AV	J	No	absent	1
Wil-1	72AV	J	No	absent	4
Nov-03	342AV	J-like	nd	absent	1
Altai-5	548AV	J-like	nd	present	1
Bas-1	347AV	J-like	nd	absent	1
Chab-1	351AV	J-like	nd	absent	1
Chab-2	352AV	J-like	nd	absent	1
Chi-1	272AV	J-like	nd	absent	1
Koch-1	598AV	J-like	nd	present	1
Leb-4	339AV	J-like	nd	absent	1
Mas	354AV	J-like	nd	absent	1
Nos	343AV	J-like	nd	absent	1
Pan	353AV	J-like	nd	absent	1
Per-2	499AV	J-like	nd	absent	1
Per-3	500AV	J-like	nd	absent	1
Rak-1	344AV	J-like	nd	absent	1
Rak-3	346AV	J-like	nd	absent	1
Sev	350AV	J-like	nd	absent	1
Truk-1	595AV	J-like	nd	absent	1
Kn-0	70AV	K	nd	absent	4
N7	263AV	K	nd	absent	1
Rubezhnoe-1	231AV	K	nd	absent	1
Ber	299AV	K-N-O-like	nd	absent	4
Bu-0	182AV	K-N-O-like	nd	absent	4
Castelfed-4b	673AV	K-N-O-like	nd	absent	2
Cyr	28AV	K-N-O-like	nd	absent	3
Ms-0	451AV	K-N-O-like	nd	absent	1
N1	289AV	K-N-O-like	nd	absent	1
N12	286AV	K-N-O-like	nd	absent	1
N17	269AV	K-N-O-like	nd	absent	1
N2	290AV	K-N-O-like	nd	absent	1
Sar-2	305AV	K-N-O-like	nd	absent	3
Vezzano-2a	675AV	K-N-O-like	nd	absent	2
Voeran-1	652AV	K-N-O-like	nd	absent	2
Vorst-1	611AV	K-N-O-like	nd	absent	3
Wha2	24AV	K-N-O-like	nd	absent	3
Br-0	60AV	L	nd	absent	4
An-1	96AV	N	nd	absent	4
Blh-1	180AV	N	nd	absent	4
Edi-0	83AV	N	nd	absent	3
Enkheim-T	197AV	N	nd	absent	4
Ge-0	101AV	N	nd	absent	3
Gr-3	58AV	N	nd	absent	4
No-0	49AV	N	nd	absent	4
Bik-1	541AV	new chlorotype	nd	absent	2
Cnt-1	185AV	new chlorotype	nd	absent	3
Fer-5	6AV	new chlorotype	nd	absent	2
Kyoto	256AV	new chlorotype	nd	absent	4
Mammo-1	658AV	new chlorotype	nd	absent	3
Ts-7	518AV	new chlorotype	nd	absent	3
Xan-1	582AV	new chlorotype	nd	absent	3
Rak-0	228AV	O	nd	absent	4
Nok-1	95AV	P	nd	absent	4
Ws-0	84AV	P	nd	absent	4
Le-0	97AV	P-like	nd	absent	4
Li-2	119AV	P-like	nd	absent	4
Mah-1	323AV	P-like	nd	absent	3
Nc-1	218AV	P-like	nd	absent	3
Chi-0	89AV	Q	nd	absent	1
N14	267AV	Q	nd	absent	1
Rld-2	229AV	Q	nd	absent	4
Fl-3	472AV	Q-like	nd	absent	1
RLD1	230AV	Q-like	nd	absent	4
Rsch-0	504AV	Q-like	nd	absent	1
Kas-1	108AV	R	nd	absent	1
Ms-0	93AV	R	nd	absent	1
N6	262AV	R	nd	absent	1
Hodja-Obi-Garm	203AV	S	No	absent	1
Hodja-Obi-Garm bis	270AV	S	No	absent	1
Kondara	190AV	S	No	absent	1
Ws	244AV	T	nd	absent	4
N10	265AV	T-like	nd	absent	1
Borsk-2	677AV	T-U-like	nd	absent	1
Geg-14	589AV	T-U-like	nd	absent	1
Ct-1	162AV	U	nd	absent	4
Dra-0	194AV	U	nd	absent	4
N4	260AV	U	nd	absent	1
N8	264AV	U	nd	absent	1
Neo-6	540AV	U	No	absent	1
Pi-0	40AV	U	nd	absent	4
Rd-0	142AV	U-like	nd	absent	4
Star-8	683AV	U-like	nd	absent	4
Tu-1	519AV	U-like	nd	absent	4
Uk-3	521AV	U-like	nd	absent	4
Uk-4	522AV	U-like	nd	absent	3
Vi-0	144AV	U-like	nd	absent	4
Yeg-1	590AV	U-like	nd	absent	1
Stw-0	92AV	V	nd	absent	4
Abd-0	177AV	W	nd	absent	3
Fl-1	199AV	W	nd	absent	4
Jea	25AV	W	nd	absent	3
Kin-0	209AV	W	nd	absent	3
Nd-1	220AV	W	nd	absent	4
Ri-0	160AV	W	nd	absent	3
Ang-0	99AV	W-Y-Z-like	nd	absent	4
Js-0	298AV	W-Y-Z-like	nd	absent	4
Sofia-1	601AV	W-Y-Z-like	nd	absent	4
Arg-4	3AV	W-Z-like	nd	absent	3
Es-0	73AV	W-Z-like	nd	absent	3
Fet-10	17AV	W-Z-like	nd	absent	3
Ge-1	476AV	W-Z-like	nd	absent	4
Ge-2	477AV	W-Z-like	nd	absent	3
Gy-0	65AV	W-Z-like	nd	absent	3
Hl-2	479AV	W-Z-like	nd	absent	4
Je-0	45AV	W-Z-like	nd	absent	4
Nd-0	219AV	W-Z-like	nd	absent	4
Wei-0	242AV	W-Z-like	nd	absent	4
Wha1	23AV	W-Z-like	nd	absent	3
Niigata	255AV	X	nd	absent	4
Dr-0	51AV	Y	nd	absent	4
Rsch-4	90AV	Z	nd	absent	4
Te-0	68AV	Z	nd	absent	4
* according to Moison et al, 2010
**nd: not determined
*** according to Simon et al, 2012
