# Supplementary material for: A Cryptic Cytoplasmic Male Sterility Unveils a Possible Gynodioecious Past for Arabidopsis thaliana
Source: PLoS One. 2013 Apr 29;8(4):e62450. doi: 10.1371/journal.pone.0062450 (PMC3639211; doi:10.1371/journal.pone.0062450)
Supplement: Table S6 — Distribution of nuclear and cytoplasmic polymorphisms in the neo-Sha natural population. The genotypes at tested msat markers were arbitrarily labeled A (neo-3-like) or B (neo-6-like) (Loudet and Trontin, personal communication). (XLS) [file pone.0062450.s014.xls]

## Sheet: Feuil3
			MSAT markers
			T27K12	MSAT2.26	MSAT2.4	NGA172	Msat3,19	Msat3.1	Msat3.21	NGA8	Mast4.18	ICE5	ICE3	MUM2
		chr	1	2	2	3	3	3	3	4	4	5	5	5
		position	15926702	1945453	13831870	786303	8808167	12170600	17282665	5628810	11966304	7705251	16144941	25530055
individual plant	Chlorotype	orf117Sha
2	I	present	A	A	A	A	A	A	A	A	A	A	A	nd
3 (539AV)	I	present	A	A	A	A	A	A	nd	A	A	A	A	A
11	I	present	A	A	A	A	A	A	A	A	A	A	A	A
14	I	present	A	A	A	A	A	A	A	A	A	A	A	A
16	I	present	A	A	A	A	A	A	A	A	A	A	A	A
17	I	present	A	A	A	A	A	A	A	A	A	A	A	A
18	I	present	A	A	A	A	A	A	A	A	A	A	A	A
19	I	present	A	A	A	A	A	nd	A	A	A	A	A	A
20	I	present	A	A	A	A	A	A	A	A	A	A	A	A
23	I	present	B	B	B	B	nd	B	B	B	B	A	B	B
1	U	absent	B	B	B	B	B	B	B	B	B	B	B	B
4	U	absent	B	B	B	nd	B	B	B	B	B	B	B	B
6 (540AV)	U	absent	B	B	B	B	B	B	B	B	B	B	B	B
5	U	absent	B	B	B	B	B	nd	nd	B	B	B	B	B
7	U	absent	B	nd	B	B	B	B	nd	B	B	B	B	B
8	U	absent	B	B	B	B	B	B	B	B	B	B	B	B
9	U	absent	B	B	B	B	B	B	nd	B	B	B	B	B
10	U	absent	B	B	B	B	B	B	B	B	B	B	B	B
12	U	absent	B	B	B	B	B	B	B	B	B	B	B	B
13	U	absent	B	B	B	B	B	B	B	B	B	B	B	B
15	U	absent	B	B	B	B	B	B	B	B	B	B	B	B
21	U	absent	B	B	B	B	B	B	B	B	B	B	B	B
22	U	absent	B	B	B	B	B	B	B	B	B	B	B	B
24	U	absent	B	B	B	B	B	B	B	B	B	B	B	B
25	U	absent	B	B	B	B	B	B	B	B	B	B	B	B
nd: missing data
